# Supplementary material
Source: ML conference proceedings conference paper supplement (https://proceedings.neurips.cc/paper_files/paper/2023/hash/0073cc73e1873b35345209b50a3dab66-Abstract.html)
Supplement: Supplementary file 1 [file 0073cc73e1873b35345209b50a3dab66-Supplemental-Conference.pdf]

---

# PDF: Point Diffusion Implicit Function for Large-scale Scene Neural Representation

---

## Appendix

1 *In this appendix, we provide experimental results on more benchmarks to further explore the effec-*  
2 *tiveness of our point diffusion implicit function for large-scale scenes (Sec. A and B) and conduct*  
3 *more ablation experiments (Sec. C).*

### 4 **A Experiments on the BlendMVS Datasets**

5 **Dataset and Baseline.** The BlendedMVS [7] dataset is a large-scale synthetic dataset for multi-view  
6 stereo containing 113 scenes, which can be further divided into large-scale outdoor scenes part and  
7 small-scale objects part according to the scene scale. Since current large-scene NeRF methods are  
8 one model per scene, to save computational resources and time, we select the first five scenes of the  
9 large-scale outdoor scenes part and compare with Mip-NeRF 360 [2], which is the optimal baseline  
10 on the representative subset of OMMO dataset [3] as shown in our manuscript, see Tab. 4 and Fig. 6 .  
11 It can be seen that our method has a significant improvement over Mip-NeRF 360 [2] in relation to  
12 PSNR, SSIM and LPIPS, and synthesizes more realistic novel view images.

**Mip-NeRF 360**

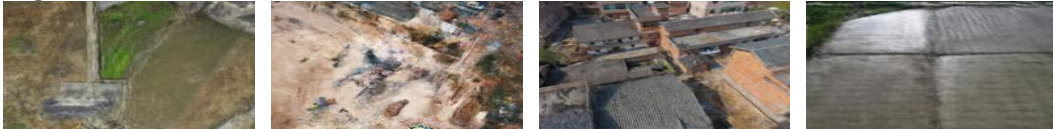

**Ours**

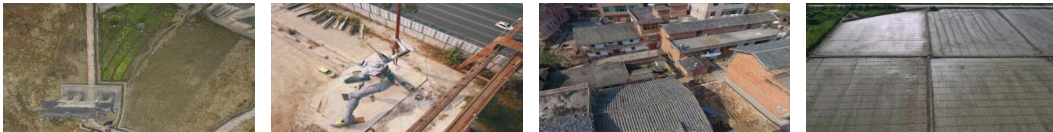

**GT**

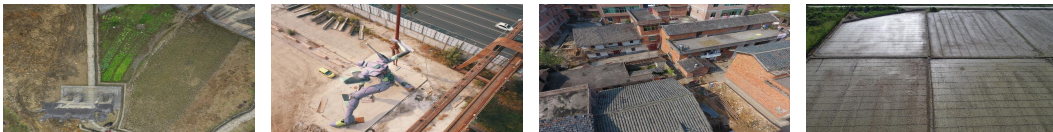

Figure 6: Qualitative results of our PDF method with the baseline Mip-NeRF 360 on the first five large-scale outdoor scenes of the BlendedMVS dataset (zoom-in for the best view).

| Scene       | Mip-NeRF 360[2] |                 |                    | Ours            |                 |                    |
|-------------|-----------------|-----------------|--------------------|-----------------|-----------------|--------------------|
|             | PSNR $\uparrow$ | SSIM $\uparrow$ | LPIPS $\downarrow$ | PSNR $\uparrow$ | SSIM $\uparrow$ | LPIPS $\downarrow$ |
| 1           | 15.43           | 0.27            | 0.318              | <b>19.74</b>    | <b>0.67</b>     | <b>0.246</b>       |
| 2           | 13.65           | 0.16            | 0.252              | <b>21.42</b>    | <b>0.68</b>     | <b>0.152</b>       |
| 3           | 19.59           | 0.43            | 0.344              | <b>20.93</b>    | <b>0.65</b>     | <b>0.213</b>       |
| 4           | 18.84           | 0.38            | 0.349              | <b>19.80</b>    | <b>0.68</b>     | <b>0.267</b>       |
| 5           | 17.05           | 0.30            | <b>0.207</b>       | <b>19.18</b>    | <b>0.62</b>     | 0.271              |
| <b>Mean</b> | 16.91           | 0.31            | 0.294              | <b>20.21</b>    | <b>0.66</b>     | <b>0.230</b>       |

Table 4: Quantitative results of our PDF method with the baseline Mip-NeRF 360 on the first five large-scale outdoor scenes of the BlendedMVS dataset.  $\uparrow$  means the higher, the better.

## 13 B Experiments on the Full OMMO Datasets

14 In the manuscript, we have reported performance on the representative subset of the OMMO  
 15 dataset [3]. A more comprehensive evaluation on all scenes from the OMMO dataset is shown  
 16 in Tab. 5 and Fig. 7. Our method still outperforms other state-of-the-art methods on average and most  
 17 scenes, and synthesizes photo-realistic images, consistent with results on the representative subset.

| Scene ID    | NeRF[4]         |                 |                    | NeRF++[8]       |                 |                    | Mip-NeRF[1]     |                 |                    | Mip-NeRF 360[2] |                 |                    | Mega-NeRF[5]    |                 |                    | Ref-NeRF[6]     |                 |                    | Ours            |                 |                    |
|-------------|-----------------|-----------------|--------------------|-----------------|-----------------|--------------------|-----------------|-----------------|--------------------|-----------------|-----------------|--------------------|-----------------|-----------------|--------------------|-----------------|-----------------|--------------------|-----------------|-----------------|--------------------|
|             | PSNR $\uparrow$ | SSIM $\uparrow$ | LPIPS $\downarrow$ | PSNR $\uparrow$ | SSIM $\uparrow$ | LPIPS $\downarrow$ | PSNR $\uparrow$ | SSIM $\uparrow$ | LPIPS $\downarrow$ | PSNR $\uparrow$ | SSIM $\uparrow$ | LPIPS $\downarrow$ | PSNR $\uparrow$ | SSIM $\uparrow$ | LPIPS $\downarrow$ | PSNR $\uparrow$ | SSIM $\uparrow$ | LPIPS $\downarrow$ | PSNR $\uparrow$ | SSIM $\uparrow$ | LPIPS $\downarrow$ |
| 1           | 16.93           | 0.37            | 0.744              | 16.86           | 0.36            | 0.780              | 16.84           | 0.37            | 0.793              | 13.91           | 0.31            | 0.771              | 16.12           | 0.34            | 0.782              | 15.10           | 0.34            | 0.755              | 14.80           | 0.32            | 0.755              |
| 2           | 15.31           | 0.44            | 0.694              | 14.89           | 0.47            | 0.653              | 15.16           | 0.40            | 0.731              | 15.06           | 0.44            | 0.646              | 15.64           | 0.47            | 0.679              | 15.90           | 0.49            | 0.632              | 19.63           | 0.62            | 0.374              |
| 3           | 14.38           | 0.28            | 0.556              | 14.64           | 0.29            | 0.547              | 14.56           | 0.29            | 0.533              | 14.25           | 0.31            | 0.526              | 15.21           | 0.33            | 0.517              | 15.44           | 0.37            | 0.526              | 14.74           | 0.34            | 0.515              |
| 4           | 25.39           | 0.86            | 0.431              | 27.47           | 0.90            | 0.380              | 21.78           | 0.76            | 0.469              | 27.68           | 0.94            | 0.292              | 23.36           | 0.86            | 0.419              | 27.86           | 0.91            | 0.404              | 31.74           | 0.94            | 0.202              |
| 5           | 22.26           | 0.67            | 0.531              | 24.32           | 0.73            | 0.450              | 14.98           | 0.54            | 0.633              | 25.76           | 0.80            | 0.317              | 25.78           | 0.76            | 0.436              | 23.54           | 0.71            | 0.491              | 27.58           | 0.90            | 0.162              |
| 6           | 24.09           | 0.68            | 0.504              | 25.59           | 0.75            | 0.396              | 23.18           | 0.66            | 0.529              | 28.86           | 0.90            | 0.211              | 24.92           | 0.77            | 0.393              | 26.07           | 0.72            | 0.459              | 23.69           | 0.87            | 0.212              |
| 7           | 5.36            | 0.17            | 0.747              | 21.93           | 0.71            | 0.542              | 15.57           | 0.64            | 0.624              | 23.05           | 0.73            | 0.523              | 22.33           | 0.69            | 0.552              | 25.79           | 0.73            | 0.511              | 21.46           | 0.81            | 0.193              |
| 8           | 21.14           | 0.50            | 0.594              | 22.91           | 0.57            | 0.509              | 19.82           | 0.46            | 0.638              | 25.07           | 0.71            | 0.354              | 16.65           | 0.48            | 0.431              | 21.21           | 0.49            | 0.606              | 27.62           | 0.92            | 0.101              |
| 9           | 14.92           | 0.34            | 0.744              | 14.57           | 0.34            | 0.732              | 14.58           | 0.34            | 0.746              | 15.40           | 0.30            | 0.706              | 17.32           | 0.49            | 0.673              | 20.34           | 0.43            | 0.649              | 15.77           | 0.49            | 0.381              |
| 10          | 22.26           | 0.55            | 0.626              | 24.37           | 0.60            | 0.578              | 19.80           | 0.53            | 0.643              | 26.68           | 0.72            | 0.420              | 21.78           | 0.62            | 0.558              | 24.23           | 0.58            | 0.597              | 25.74           | 0.83            | 0.136              |
| 11          | 22.36           | 0.82            | 0.420              | 24.61           | 0.85            | 0.342              | 22.81           | 0.82            | 0.423              | 27.06           | 0.93            | 0.217              | 24.37           | 0.84            | 0.392              | 23.81           | 0.84            | 0.355              | 30.29           | 0.95            | 0.188              |
| 12          | 22.41           | 0.59            | 0.533              | 24.29           | 0.68            | 0.447              | 22.13           | 0.60            | 0.526              | 28.12           | 0.83            | 0.274              | 21.60           | 0.62            | 0.493              | 23.06           | 0.60            | 0.524              | 27.92           | 0.86            | 0.203              |
| 13          | 22.27           | 0.59            | 0.608              | 23.52           | 0.62            | 0.581              | 18.90           | 0.54            | 0.673              | 26.63           | 0.77            | 0.403              | 25.50           | 0.72            | 0.517              | 23.29           | 0.61            | 0.594              | 25.94           | 0.74            | 0.205              |
| 14          | 19.85           | 0.55            | 0.569              | 23.89           | 0.74            | 0.417              | 17.06           | 0.48            | 0.655              | 28.06           | 0.89            | 0.224              | 24.42           | 0.75            | 0.411              | 21.76           | 0.63            | 0.508              | 28.11           | 0.94            | 0.127              |
| 15          | 20.35           | 0.53            | 0.552              | 21.71           | 0.61            | 0.490              | 19.44           | 0.49            | 0.594              | 28.63           | 0.89            | 0.179              | 22.69           | 0.67            | 0.445              | 20.33           | 0.50            | 0.576              | 27.22           | 0.89            | 0.136              |
| 16          | 17.86           | 0.40            | 0.631              | 18.75           | 0.41            | 0.597              | 18.49           | 0.40            | 0.610              | 10.01           | 0.34            | 0.850              | 20.26           | 0.53            | 0.509              | 19.64           | 0.43            | 0.572              | 18.70           | 0.47            | 0.392              |
| 17          | 22.02           | 0.57            | 0.610              | 24.20           | 0.67            | 0.461              | 17.01           | 0.53            | 0.696              | 29.53           | 0.83            | 0.247              | 17.23           | 0.57            | 0.529              | 23.17           | 0.59            | 0.529              | 26.59           | 0.88            | 0.111              |
| 18          | 26.06           | 0.75            | 0.428              | 25.57           | 0.73            | 0.461              | 24.61           | 0.73            | 0.469              | 28.55           | 0.86            | 0.265              | 24.76           | 0.73            | 0.448              | 22.79           | 0.67            | 0.569              | 27.07           | 0.91            | 0.152              |
| 19          | 14.20           | 0.40            | 0.726              | 13.86           | 0.37            | 0.703              | 13.84           | 0.39            | 0.738              | 14.72           | 0.37            | 0.676              | 23.81           | 0.68            | 0.465              | 14.34           | 0.39            | 0.691              | 28.55           | 0.84            | 0.170              |
| 20          | 22.84           | 0.61            | 0.499              | 23.28           | 0.64            | 0.475              | 22.41           | 0.60            | 0.519              | 28.33           | 0.86            | 0.228              | 21.11           | 0.63            | 0.490              | 21.54           | 0.55            | 0.574              | 26.88           | 0.81            | 0.197              |
| 21          | 22.59           | 0.51            | 0.532              | 21.84           | 0.47            | 0.593              | 22.31           | 0.51            | 0.537              | 25.64           | 0.75            | 0.344              | 21.92           | 0.51            | 0.578              | 21.07           | 0.44            | 0.672              | 28.62           | 0.94            | 0.141              |
| 22          | 16.53           | 0.47            | 0.733              | 20.66           | 0.56            | 0.575              | 13.37           | 0.42            | 0.776              | 24.79           | 0.77            | 0.362              | 20.84           | 0.60            | 0.527              | 20.31           | 0.53            | 0.615              | 26.33           | 0.85            | 0.074              |
| 23          | 18.99           | 0.41            | 0.669              | 19.51           | 0.42            | 0.597              | 18.09           | 0.39            | 0.671              | 21.25           | 0.51            | 0.539              | 20.13           | 0.44            | 0.585              | 19.94           | 0.41            | 0.622              | 21.64           | 0.65            | 0.206              |
| 24          | 19.32           | 0.39            | 0.696              | 23.14           | 0.52            | 0.535              | 16.89           | 0.37            | 0.715              | 25.86           | 0.71            | 0.373              | 23.87           | 0.56            | 0.518              | 22.17           | 0.45            | 0.616              | 30.90           | 0.87            | 0.097              |
| 25          | 24.72           | 0.55            | 0.528              | 22.42           | 0.51            | 0.613              | 24.24           | 0.54            | 0.542              | 28.91           | 0.79            | 0.306              | 25.98           | 0.63            | 0.457              | 23.62           | 0.50            | 0.598              | 30.85           | 0.94            | 0.083              |
| 26          | 8.56            | 0.24            | 0.564              | 19.94           | 0.59            | 0.513              | 13.43           | 0.35            | 0.688              | 14.59           | 0.46            | 0.626              | 19.23           | 0.67            | 0.467              | 21.00           | 0.62            | 0.489              | 23.88           | 0.83            | 0.311              |
| 27          | 4.54            | 0.01            | 0.705              | 21.25           | 0.55            | 0.546              | 14.82           | 0.45            | 0.674              | 21.26           | 0.60            | 0.235              | 20.59           | 0.61            | 0.543              | 20.82           | 0.52            | 0.590              | 21.77           | 0.66            | 0.164              |
| 28          | 24.48           | 0.66            | 0.479              | 23.28           | 0.64            | 0.475              | 24.76           | 0.66            | 0.406              | 29.62           | 0.87            | 0.240              | 25.87           | 0.72            | 0.442              | 22.17           | 0.45            | 0.616              | 29.22           | 0.91            | 0.153              |
| 29          | 22.98           | 0.61            | 0.540              | 23.17           | 0.62            | 0.529              | 23.01           | 0.61            | 0.539              | 25.51           | 0.74            | 0.400              | 21.57           | 0.61            | 0.557              | 21.11           | 0.54            | 0.631              | 25.86           | 0.84            | 0.174              |
| 30          | 20.23           | 0.52            | 0.605              | 23.27           | 0.64            | 0.476              | 18.63           | 0.46            | 0.675              | 26.54           | 0.84            | 0.296              | 24.04           | 0.69            | 0.459              | 21.62           | 0.54            | 0.586              | 26.10           | 0.93            | 0.096              |
| 31          | 18.97           | 0.37            | 0.645              | 19.05           | 0.37            | 0.643              | 18.91           | 0.36            | 0.659              | 13.08           | 0.23            | 0.708              | 20.93           | 0.60            | 0.545              | 19.18           | 0.37            | 0.645              | 26.68           | 0.90            | 0.208              |
| 32          | 17.99           | 0.58            | 0.621              | 18.99           | 0.61            | 0.540              | 11.28           | 0.42            | 0.687              | 17.16           | 0.57            | 0.601              | 21.29           | 0.70            | 0.475              | 18.98           | 0.60            | 0.565              | 23.43           | 0.69            | 0.142              |
| 33          | 5.79            | 0.01            | 0.745              | 20.19           | 0.50            | 0.597              | 14.31           | 0.42            | 0.755              | 22.76           | 0.63            | 0.457              | 22.89           | 0.64            | 0.478              | 21.23           | 0.52            | 0.578              | 22.91           | 0.75            | 0.134              |
| <b>Mean</b> | 18.72           | 0.48            | 0.600              | 21.45           | 0.58            | 0.538              | 18.39           | 0.50            | 0.623              | 23.10           | 0.67            | 0.419              | 21.63           | 0.62            | 0.508              | 21.28           | 0.55            | 0.574              | 25.10           | 0.79            | 0.205              |

Table 5: Quantitative results of our PDF method with the baselines on the full OMMO dataset.  $\uparrow$  means the higher, the better.

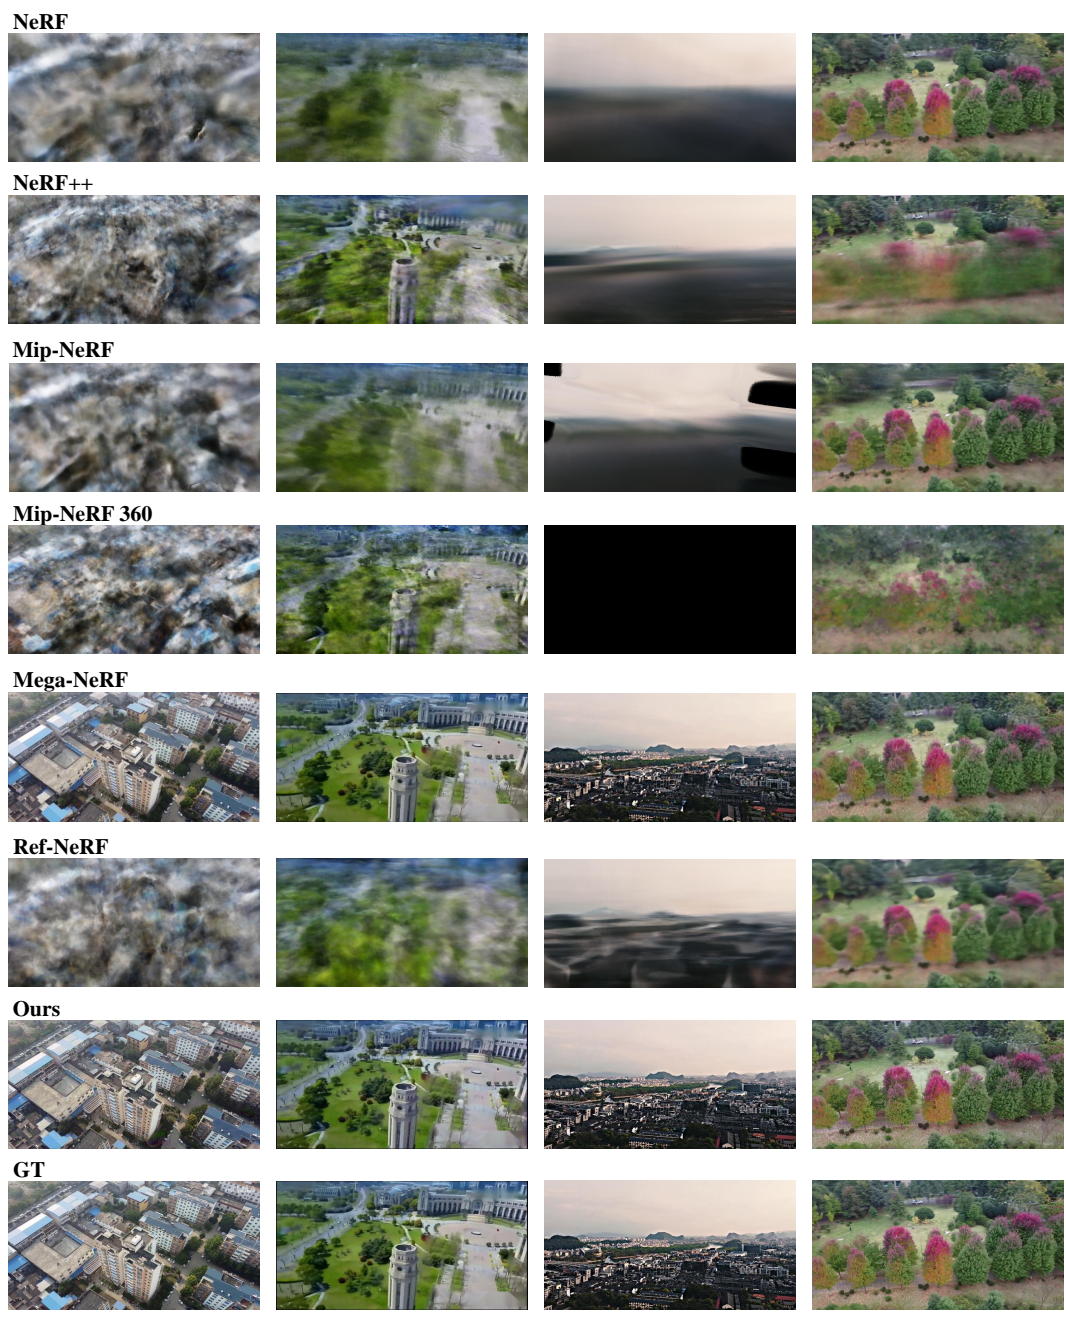

Part 1/2

Figure 7: More qualitative visualization results for novel view synthesis (zoom-in for the best view) on the full OMMO dataset.

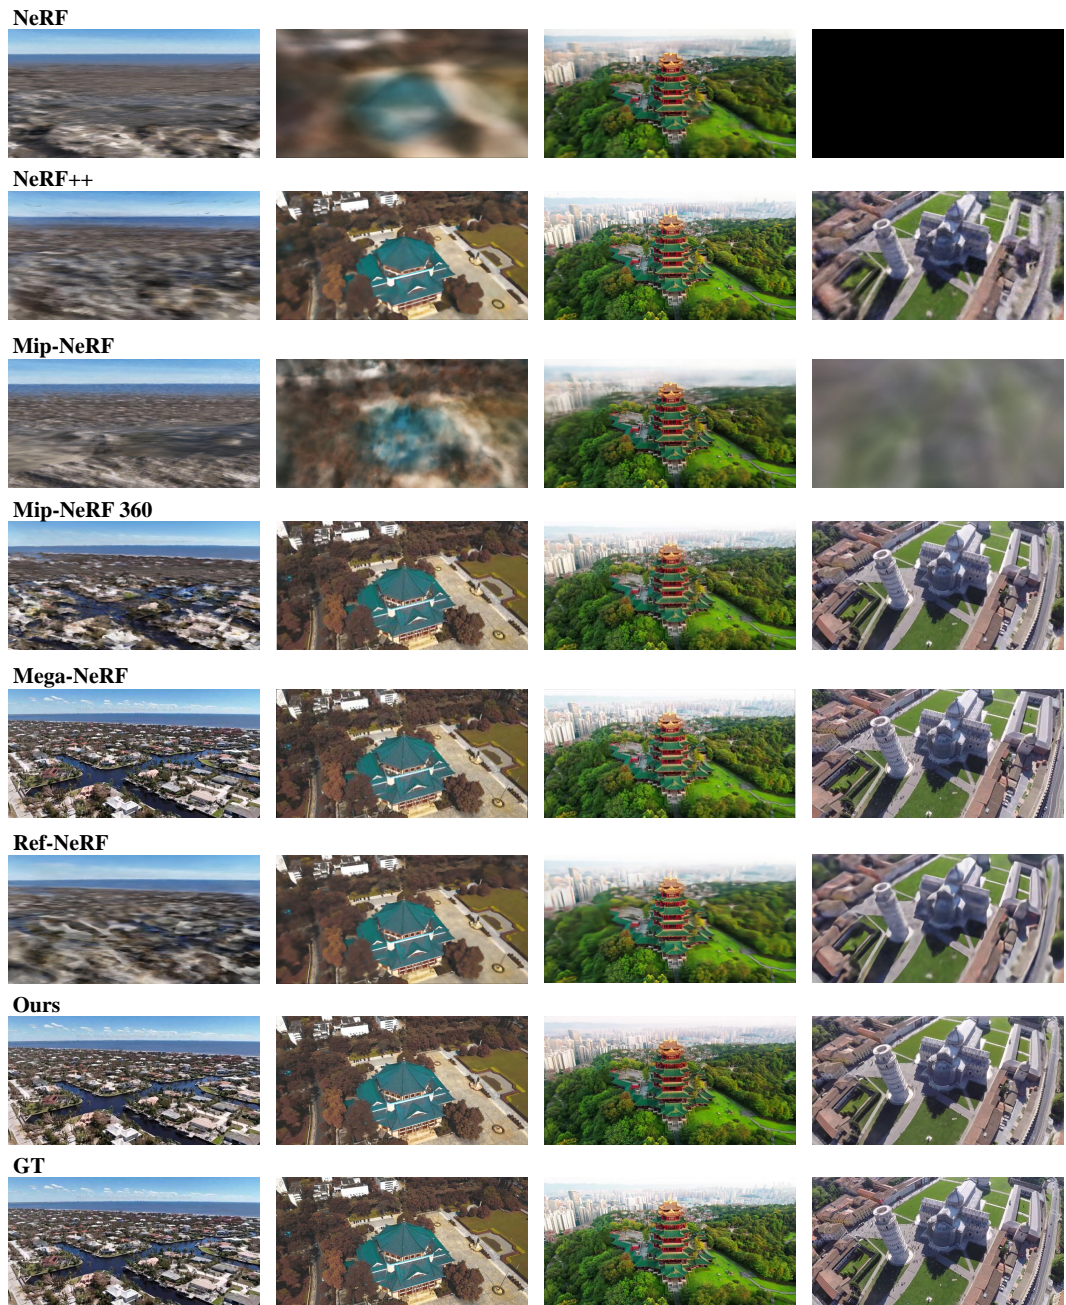

Part 2/2

Figure 7. More qualitative visualization results for novel view synthesis (zoom-in for the best view) on the full OMMO dataset.

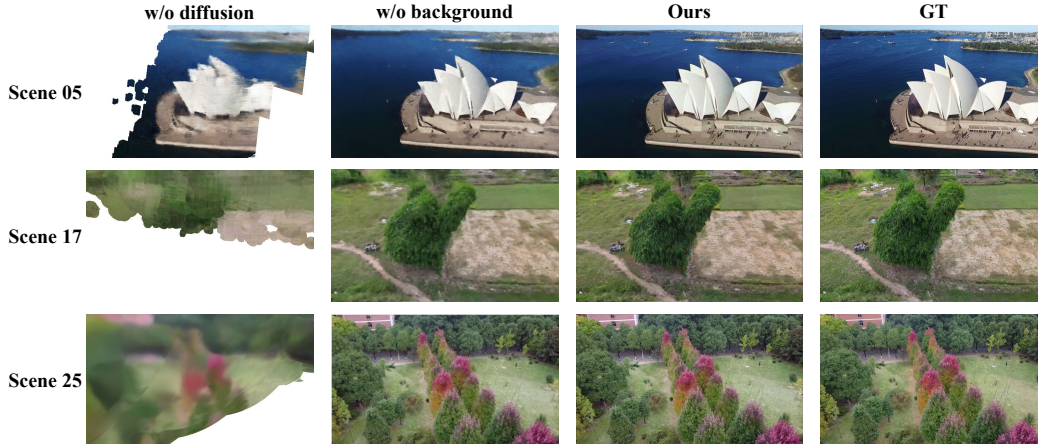

Figure 8: Qualitative ablation performance for more scenes on the OMMO dataset. From left to right: removing the diffusion-based point cloud up-sampling module, removing the background fusion module, our PDF method, and the groundtruth.

## 18 C Ablation Study

19 In order to further demonstrate the effectiveness of each module, we provide ablation experiment  
 20 results of more scenes on whether to use the point cloud up-sampling diffusion module and whether to  
 21 use the background fusion module(*cf.* Fig. 8 and Tab. 6). It can be seen that both the diffusion-based  
 22 point cloud up-sampling module and the background fusion module play an important role in our  
 23 method. The former generates dense point cloud surfaces from sparse surface priors and reduces the  
 24 sampling space; the latter complements background features that point clouds cannot provide.

Table 6: Quantitative ablation performance for more scenes (scene id 05, 17, and 25) on the OMMO dataset, including removing the diffusion-based point cloud up-sampling module, removing the background fusion module, our PDF method.

| Method         | PSNR $\uparrow$ | SSIM $\uparrow$ | LPIPS $\downarrow$ |
|----------------|-----------------|-----------------|--------------------|
| w/o diffusion  | 9.48            | 0.47            | 0.325              |
| w/o background | 24.77           | 0.81            | 0.187              |
| <b>Ours</b>    | <b>28.34</b>    | <b>0.91</b>     | <b>0.119</b>       |

## 25 References

- 26 [1] Jonathan T Barron, Ben Mildenhall, Matthew Tancik, Peter Hedman, Ricardo Martin-Brualla, and Pratul P  
 27 Srinivasan. Mip-nerf: A multiscale representation for anti-aliasing neural radiance fields. In *Proceedings of*  
 28 *the IEEE/CVF International Conference on Computer Vision*, pages 5855–5864, 2021.
- 29 [2] Jonathan T Barron, Ben Mildenhall, Dor Verbin, Pratul P Srinivasan, and Peter Hedman. Mip-nerf 360:  
 30 Unbounded anti-aliased neural radiance fields. In *Proceedings of the IEEE/CVF Conference on Computer*  
 31 *Vision and Pattern Recognition*, pages 5470–5479, 2022.
- 32 [3] Chongshan Lu, Fukun Yin, Xin Chen, Tao Chen, Gang Yu, and Jiayuan Fan. A large-scale outdoor multi-  
 33 modal dataset and benchmark for novel view synthesis and implicit scene reconstruction. *arXiv preprint*  
 34 *arXiv:2301.06782*, 2023.
- 35 [4] Ben Mildenhall, Pratul P Srinivasan, Matthew Tancik, Jonathan T Barron, Ravi Ramamoorthi, and Ren  
 36 Ng. Nerf: Representing scenes as neural radiance fields for view synthesis. *Communications of the ACM*,  
 37 65(1):99–106, 2021.
- 38 [5] Haithem Turki, Deva Ramanan, and Mahadev Satyanarayanan. Mega-nerf: Scalable construction of  
 39 large-scale nerfs for virtual fly-throughs, 2022.

- 40 [6] Dor Verbin, Peter Hedman, Ben Mildenhall, Todd Zickler, Jonathan T Barron, and Pratul P Srinivasan.  
41 Ref-nerf: Structured view-dependent appearance for neural radiance fields. In *2022 IEEE/CVF Conference*  
42 *on Computer Vision and Pattern Recognition (CVPR)*, pages 5481–5490. IEEE, 2022.
- 43 [7] Yao Yao, Zixin Luo, Shiwei Li, Jingyang Zhang, Yufan Ren, Lei Zhou, Tian Fang, and Long Quan.  
44 Blendedmvs: A large-scale dataset for generalized multi-view stereo networks. In *Proceedings of the*  
45 *IEEE/CVF Conference on Computer Vision and Pattern Recognition*, pages 1790–1799, 2020.
- 46 [8] Kai Zhang, Gernot Riegler, Noah Snavely, and Vladlen Koltun. Nerf++: Analyzing and improving neural  
47 radiance fields. *arXiv preprint arXiv:2010.07492*, 2020.
